# Supplementary material for: Vicarious experience modulates implicit and explicit evaluation of virtual agents delivering pain and touch over an embodied avatar
Source: Research Square preprint supplement (doi:10.21203/rs.3.rs-8765445/v1), 2026-02-09
Supplement: Supplementary file 1 [file 0fe82c8dbb5913cc0310fa1c.docx]

**Supplementary Information for: (controllare di mettere il titolo finale)**

**Vicarious experience modulates implicit and explicit evaluation of virtual agents delivering pain and touch over an embodied avatar**

Lisi M.P. 1,2*, Fusaro M.1,2, March F.1,3, Aglioti S.M. 1,2

1Department of Psychology, Sapienza University of Rome and CLN2S@Sapienza, Istituto Italiano di Tecnologia, 00161, Rome, Italy.

2 IRCCS Santa Lucia Foundation, 00142, Rome, Italy

3 School of Advanced Studies, Centre for Neuroscience, University of Camerino, Camerino, Italy

*** Corresponding author:**

E-mail: [matteo.lisi@uniroma1.it](mailto:matteo.lisi@uniroma1.it)

**Motion Capture Recording**


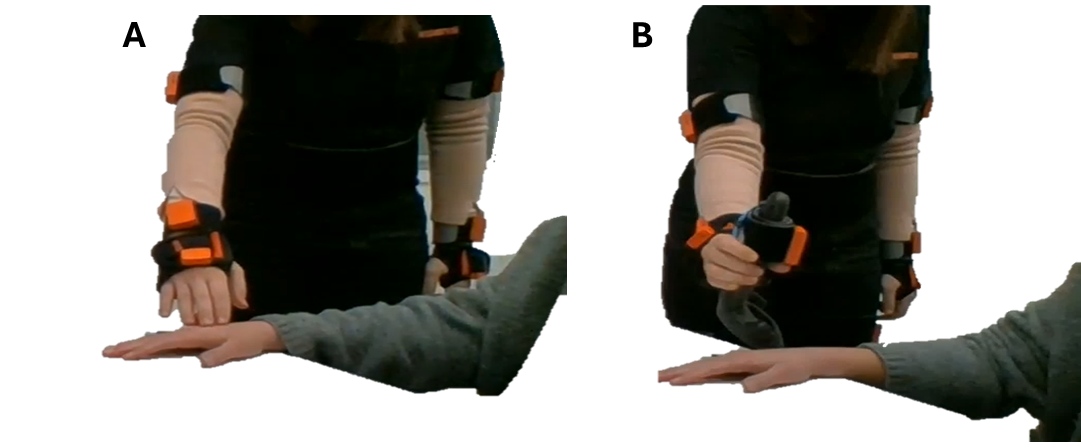


**Fig.S1** Motion capture recording. We used the Xsense motion capture suit (<https://www.xsens.com/)> to record the kinematics of an actor, either gently caressing or stabbing the right hand of another actor with the right hand.

**
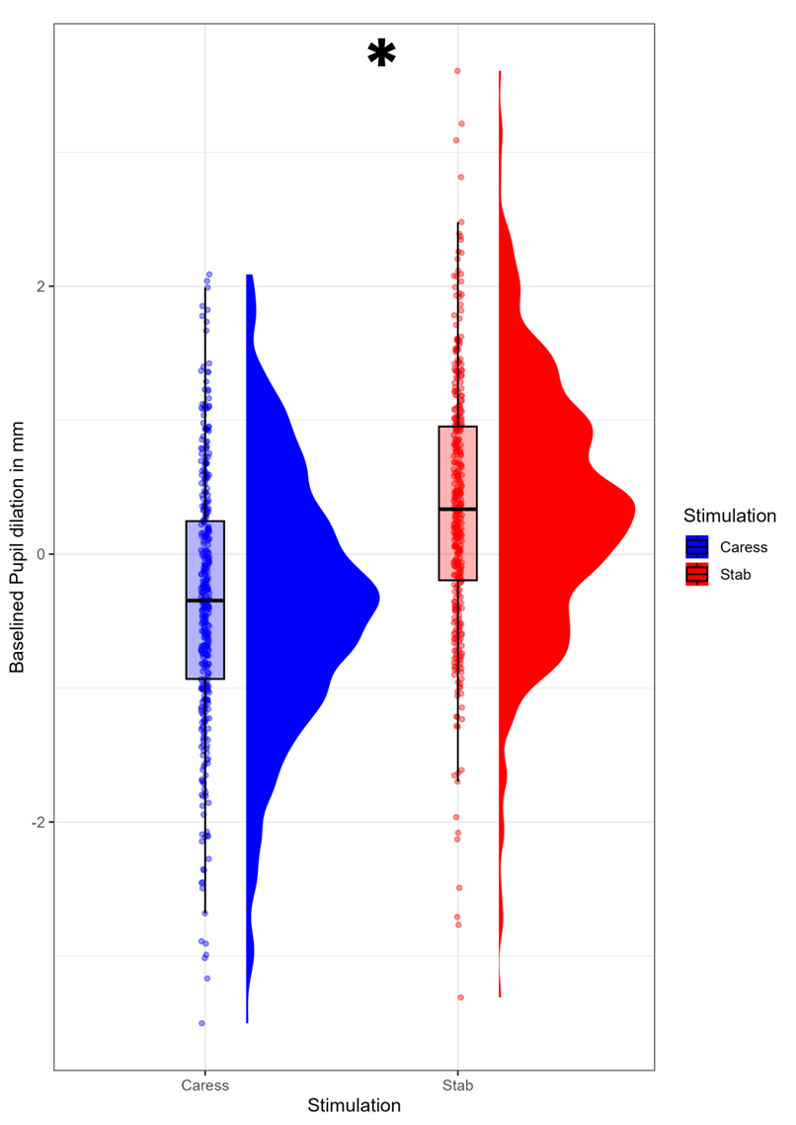
**

**Fig.S2** Pupil dilation during the touch task was higher for the stabs compared to the caresses.

**Tab.S1 Demographic characteristics of the sample**

| **Variable** | Mean | SD |
| --- | --- | --- |
| Age | 24.38 | 2.05 |
| STAI-T | 46.23 | 7.56 |
| STAI-S | 35.48 | 5.78 |
| Virtual Reality Prior Experience (0-100) | 22.30 | 29.78 |
| Resting RMSSD (pre-touch task) | 33.20 | 17.81 |
| High-Frequency n.u. (pre-touch task) | 35.97 | 19.00 |

**Tab.S2 Questions during the Touch Task.**

| **Trial-by-trial** |  |
| --- | --- |
| Attractiveness | How attractive do you find the avatar you just observed? |
| Trustworthiness | How trustworthy do you find the avatar you just observed? |
| UnPleasantness | How unpleasant/pleasant was the stimulus (0= extremely unpleasant; 50=neutral; 100= extremely pleasant)? |
| Vicariousness | It felt as if the stimulus was applied to my body. |
| **End Block** |  |
| Body Ownership | It was like I was watching my body |
| Body Ownership | It was like the virtual body was my body |
| Body Ownership (Control) | It was like I had more than one body |
| Body Ownership (Control) | It was like I had not my body anymore |

**Tab.S3 Avatar validation**

59 participants (30 females, mean age = 27.67±2.73) rated multiple dimensions regarding the avatars’ appearance on 0-100 visual analogue scales. In order to assign one male and one female avatar to each type of touch, we selected the most similar in terms of perceived age: Female_Adult_07, Female_Adult_09, Male_Adult_02, Male_Adult_20.

| AvatarID | Age | Gender (0=M, 100=F) | Eurocentrism | Attractiveness | Trustworthiness | Valence (0=Negative, 100= Positive) |
| --- | --- | --- | --- | --- | --- | --- |
| F01 | 32.12 ± 5.72 | 95.78 ± 9.51 | 84.98 ± 21.87 | 65.93 ± 18.56 | 59.27 ± 18.14 | 62.58 ± 16.48 |
| F04 | 29.14 ± 4.28 | 96.92 ± 7.82 | 81.34 ± 23.03 | 66.54 ± 21.17 | 54.15 ± 18.93 | 58.78 ± 18.32 |
| F07 | 36.49 ± 8.69 | 94.12 ± 11.27 | 81.51 ± 24.23 | 55.46 ± 19.43 | 60.64 ± 18.07 | 58.56 ± 15.93 |
| F09 | 39.10 ± 6.45 | 96.36 ± 8.41 | 81.80 ± 24.22 | 54.07 ± 20.79 | 55.34 ± 19.58 | 54.03 ± 16.51 |
| F14 | 47.24 ± 8.58 | 96.71 ± 8.37 | 84.95 ± 20.43 | 49.36 ± 19.68 | 67.03 ± 17.46 | 61.02 ± 15.68 |
| M01 | 31.27 ± 5.73 | 3.73 ± 13.11 | 79.63 ± 25.47 | 46.05 ± 25.93 | 54.12 ± 20.32 | 55.93 ± 14.05 |
| M02 | 41.03 ± 6.74 | 3.22 ± 6.87 | 81.58 ± 21.93 | 33.14 ± 20.98 | 52.42 ± 17.54 | 52.41 ± 14.79 |
| M11 | 37.29 ± 6.96 | 3.47 ± 6.94 | 79.41 ± 27.83 | 30.88 ± 21.48 | 47.49 ± 22.86 | 50.69 ± 15.59 |
| M16 | 36.15 ± 7.59 | 2.51 ± 5.28 | 81.80 ± 27.86 | 40.80 ± 24.90 | 55.51 ± 19.44 | 55.53 ± 16.15 |
| M20 | 41.41 ± 6.40 | 2.41 ± 6.45 | 81.19 ± 23.42 | 39.37 ± 23.14 | 54.58 ± 20.10 | 53.36 ± 15.48 |

**Trial-by-trial changes in Attractiveness and Trustworthiness.**

To investigate trial-by-trial changes in Attractiveness and Trustworthiness during the touch task, we fit two linear mixed-effect models with the interaction between Stimulation and Trial, and the effect of (Un)Pleasantness as predictors, and by-Stimulation slopes and by-participant intercepts as random effects. For Attractiveness, we found weak evidence for a decrease over trials for the stabbing agents (-0.04± 0.02 [-0.08, -0.002], pd= 94.65%) nor for the caressing agents (-0.01± 0.02 [-0.05, 0.03], pd= 67.11%). Attractiveness change was not sustained in the subsequent interpersonal distance task (see main text). For Trustworthiness, we found no evidence of trial-by-trial change during the touch task for either the stabbing (-0.007± 0.01 [-0.03, 0.02], pd= 69.07%) nor caressing agents (0.004± 0.01 [-0.02, 0.03], pd= 60.51%). Conversely, trustworthiness change emerged in the subsequent interpersonal distance task (see main text).

**Tab.S4** Syntax for all models.

| **Task** | **Model Formula** | **Family (link)** | **Priors** |
| --- | --- | --- | --- |
| IPD | Attractiveness_sc ~ 1 + Session*Stimulation+ (1 + Stimulation||ID) | Gaussian | Fixed effects β ~ Normal(0, 1);  Intercept ~ Student_t (3, 0.1., 2.5);  Random-effects SDs ~ half-Student (3, 0, 2.5);  Residual SD ~ half- Student (3, 0, 2.5) |
| IPD | Δ Attractiveness_sc ~ 1 + Stimulation*UnPleasantness_sc + (1 + Stimulation||ID) | Student | Fixed effects β ~ Normal(0, 1);  Intercept ~ Student_t (3, 0.1., 2.5);  Likelihood df (nu) ~ Gamma (2, 0.1.), lower-bounded at 1;  Random-effects SDs ~ half-Student (3, 0, 2.5);  Residual SD ~ half- Student (3, 0, 2.5) |
| IPD | Trustworthiness_sc ~ 1 + Session*Stimulation+ (1 + Stimulation||ID) | Gaussian | Fixed effects β ~ Normal(0, 1);  Intercept ~ Student_t (3, 0.1., 2.5);  Likelihood df (nu) ~ Gamma (2, 0.1.), lower-bounded at 1;  Random-effects SDs ~ half-Student (3, 0, 2.5);  Residual SD ~ half- Student (3, 0, 2.5) |
| IPD | Δ Trustworthiness _sc ~ 1 + Stimulation*UnPleasantness_sc + (1 + Stimulation||ID) | Student | Fixed effects β ~ Normal(0, 1);  Intercept ~ Student_t (3, 0.1., 2.5);  Likelihood df (nu) ~ Gamma (2, 0.1.), lower-bounded at 1;  Random-effects SDs ~ half-Student (3, 0, 2.5);  Residual SD ~ half- Student (3, 0, 2.5) |
| IPD | IPD_sc ~ 1 + Session*Stimulation + STAI_Trait_sc + STAI_State_sc+ (1+Stimulation|ID) | Student | Fixed effects β ~ Normal(0, 1);  Intercept ~ Student_t (3, -0.1, 2.5);  Likelihood df (nu) ~ Gamma (2, 0.1.), lower-bounded at 1;  Random-effects SDs ~ half-Student (3, 0, 2.5);  Random-effects Cor ~ LKJ(1) on Cholesky factor  Residual SD ~ half- Student (3, 0, 2.5) |
| IPD | Δ IPD _sc ~ 1 + Stimulation*UnPleasantness_sc + STAI_Trait_sc + STAI_State_sc + (1 + Stimulation||ID) | Student | Fixed effects β ~ Normal(0, 1);  Intercept ~ Student_t (3, -0.2., 2.5);  Likelihood df (nu) ~ Gamma (2, 0.1.), lower-bounded at 1;  Random-effects SDs ~ half-Student (3, 0, 2.5);  Residual SD ~ half- Student (3, 0, 2.5) |
| IPD | HR_sc ~ 1 + Session*Stimulation + STAI_Trait_sc + STAI_State_sc+ (1+Stimulation|ID) | Student | Fixed effects β ~ Normal(0, 1);  Intercept ~ Student_t (3, 0, 2.5);  Likelihood df (nu) ~ Gamma (2, 0.1.), lower-bounded at 1;  Random-effects SDs ~ half-Student (3, 0, 2.5);  Random-effects Cor ~ LKJ(1) on Cholesky factor  Residual SD ~ half- Student (3, 0, 2.5) |
| IPD | Δ HR _sc ~ 1 + Stimulation*UnPleasantness_sc + STAI_Trait_sc + STAI_State_sc + (1 + Stimulation||ID) | Student | Fixed effects β ~ Normal(0, 1);  Intercept ~ Student_t (3, -0.2., 2.5);  Likelihood df (nu) ~ Gamma (2, 0.1.), lower-bounded at 1;  Random-effects SDs ~ half-Student (3, 0, 2.5);  Residual SD ~ half- Student (3, 0, 2.5) |
| IPD | SCR_sc ~ 1 + Session*Stimulation + STAI_Trait_sc + STAI_State_sc+ (1+Stimulation|ID) | Student | Fixed effects β ~ Normal(0, 1);  Intercept ~ Student_t (3, -0.3, 2.5);  Likelihood df (nu) ~ Gamma (2, 0.1.), lower-bounded at 1;  Random-effects SDs ~ half-Student (3, 0, 2.5);  Random-effects Cor ~ LKJ(1) on Cholesky factor  Residual SD ~ half- Student (3, 0, 2.5) |
| IPD | Δ SCR_sc ~ 1 + Stimulation*UnPleasantness_sc + STAI_Trait_sc + STAI_State_sc + (1 + Stimulation||ID) | student | Fixed effects β ~ Normal(0, 1);  Intercept ~ Student_t (3, 0.2., 2.5);  Likelihood df (nu) ~ Gamma (2, 0.1.), lower-bounded at 1;  Random-effects SDs ~ half-Student (3, 0, 2.5);  Residual SD ~ half- Student (3, 0, 2.5) |
| IPD | Elog_sc ~ 1 + Session * Stimulation * TimeWindow + STAI_Trait_sc + STAI_State_sc + (1 + Stimulation | ID) | Student | Fixed effects β ~ Normal(0, 1);  Intercept ~ Student_t (3, 0.2, 2.5);  Likelihood df (nu) ~ Gamma (2, 0.1.), lower-bounded at 1;  Random-effects SDs ~ half-Student (3, 0, 2.5);  Random-effects Cor ~ LKJ(1) on Cholesky factor  Residual SD ~ half- Student (3, 0, 2.5) |
| IPD | Elog_sc ~ 1 + Stimulation * TimeWindow * UnPleasantness_sc + (1 + Stimulation || ID) | Gaussian | Fixed effects β ~ Normal(0, 1);  Intercept ~ Student_t (3, -0.1., 2.5);  Random-effects SDs ~ half-Student (3, 0, 2.5);  Residual SD ~ half- Student (3, 0, 2.5) |
| Mouse Tracking | MAD_sc ~ 1 + Session*Condition + (1|ID) + (1|stim) | Student | Fixed effects β ~ Normal(0, 1);  Intercept ~ Student_t (3, -0.3., 2.5);  Likelihood df (nu) ~ Gamma (2, 0.1.), lower-bounded at 1;  Random-effects SDs ~ half-Student (3, 0, 2.5);  Residual SD ~ half- Student (3, 0, 2.5) |
| Mouse Tracking | AUC_sc ~ 1 + Session*Condition + (1|ID) + (1|stim) | Student | Fixed effects β ~ Normal(0, 1);  Intercept ~ Student_t (3, -0.3., 2.5);  Likelihood df (nu) ~ Gamma (2, 0.1.), lower-bounded at 1;  Random-effects SDs ~ half-Student (3, 0, 2.5);  Residual SD ~ half- Student (3, 0, 2.5) |
| Mouse Tracking | RT_sc ~ 1 + Session*Condition + (1|ID) + (1|stim) | Student | Fixed effects β ~ Normal(0, 1);  Intercept ~ Student_t (3, -0.3., 2.5);  Likelihood df (nu) ~ Gamma (2, 0.1.), lower-bounded at 1;  Random-effects SDs ~ half-Student (3, 0, 2.5);  Residual SD ~ half- Student (3, 0, 2.5) |
| Touch | UnPleasantness_sc ~ 1 + Stimulation + STAI_Trait_sc+ STAI_State_sc+ Stimulation * VR_Experience_sc+ (1+ Stimulation|ID) | Gaussian | Fixed effects β ~ Normal(0, 1);  Intercept ~ Student_t (3, 0.1, 2.5);  Random-effects SDs ~ half-Student (3, 0, 2.5);  Random-effects Cor ~ LKJ(1) on Cholesky factor  Residual SD ~ half- Student (3, 0, 2.5) |
| Touch | Vicariousness_sc ~ 1 + Stimulation + STAI_Trait_sc+ STAI_State_sc+ Stimulation * VR_Experience_sc+ (1+ Stimulation|ID) | Gaussian | Fixed effects β ~ Normal(0, 1);  Intercept ~ Student_t (3, -0.1, 2.5);  Random-effects SDs ~ half-Student (3, 0, 2.5);  Random-effects Cor ~ LKJ(1) on Cholesky factor  Residual SD ~ half- Student (3, 0, 2.5) |
| Touch | SCR_sc ~ 1 + Stimulation + STAI_Trait_sc+ STAI_State_sc+ (1+ Stimulation|ID) | Student | Fixed effects β ~ Normal(0, 1);  Intercept ~ Student_t (3, -0.2, 2.5);  Random-effects SDs ~ half-Student (3, 0, 2.5);  Random-effects Cor ~ LKJ(1) on Cholesky factor  Residual SD ~ half- Student (3, 0, 2.5) |
| Touch | HR1 + Stimulation + STAI_Trait_sc+ STAI_State_sc+ (1+ Stimulation|ID) | Student | Fixed effects β ~ Normal(0, 1);  Intercept ~ Student_t (3, 0, 2.5);  Random-effects SDs ~ half-Student (3, 0, 2.5);  Random-effects Cor ~ LKJ(1) on Cholesky factor  Residual SD ~ half- Student (3, 0, 2.5) |
| Touch | PupilDiameter_sc + Stimulation + STAI_Trait_sc+ STAI_State_sc+ UnPleasantness_sc + Vicariousness_sc + (1+ Stimulation|ID) | Gaussian | Fixed effects β ~ Normal(0, 1);  Intercept ~ Student_t (3, 0, 2.5);  Random-effects SDs ~ half-Student (3, 0, 2.5);  Random-effects Cor ~ LKJ(1) on Cholesky factor  Residual SD ~ half- Student (3, 0, 2.5) |
| Touch | VAS_sc ~ OwnershipQuestion + (1+Item|ID) | Gaussian | Fixed effects β ~ Normal(0, 1);  Intercept ~ Student_t (3, -0.1, 2.5);  Random-effects SDs ~ half-Student (3, 0, 2.5);  Random-effects Cor ~ LKJ(1) on Cholesky factor  Residual SD ~ half- Student (3, 0, 2.5) |
| Touch | Attractiveness_sc ~ Stimulation*Trial + UnPleasantness_sc+ (1+Stimulation+ Trial|ID) | Gaussian | Fixed effects β ~ Normal(0, 1);  Intercept ~ Student_t (3, -0.1, 2.5);  Random-effects SDs ~ half-Student (3, 0, 2.5);  Random-effects Cor ~ LKJ(1) on Cholesky factor  Residual SD ~ half- Student (3, 0, 2.5) |
| Touch | Trustworthiness_sc ~ Stimulation*Trial + UnPleasantness_sc+ (1+Stimulation+ Trial|ID) | Gaussian | Fixed effects β ~ Normal(0, 1);  Intercept ~ Student_t (3, -0.1, 2.5);  Random-effects SDs ~ half-Student (3, 0, 2.5);  Random-effects Cor ~ LKJ(1) on Cholesky factor  Residual SD ~ half- Student (3, 0, 2.5) |
